# Supplementary material for: Thermally-induced agglomeration tailors the stability of Pt SAs on TiO2 and use in photocatalytic H2 generation
Source: Royal Society of Chemistry journal article supplement (doi:10.1039/d5ta00843c), 2025-01-01
Supplement: d5ta00843c1.pdf [file d5ta00843c1.pdf]

## Supporting Information

### Thermally-Induced Agglomeration Tailors the Stability of Pt SAs on TiO<sub>2</sub> and Use in Photocatalytic H<sub>2</sub> Generation

*Johannes Will*<sup>\*,‡</sup>, *Nikita Denisov*<sup>‡</sup>, *Shanshan Qin*<sup>‡</sup>, *Mingjian Wu*<sup>‡</sup>, *Yue Wang*<sup>‡</sup>, *Hyesung Kim*<sup>‡</sup>,  
*Nicolas Karpstein*<sup>‡</sup>, *Martin Dierner*<sup>‡</sup>, *Patrik Schmuki*<sup>\*,†,§</sup>, *Erdmann Spiecker*<sup>‡</sup>

<sup>‡</sup>Institute of Micro- and Nanostructure Research & Center for Nanoanalysis and Electron Microscopy (CENEM), Friedrich-Alexander-Universität Erlangen-Nürnberg, IZNF, Cauerstraße 3, 91058 Erlangen, Germany

<sup>†</sup>Department of Materials Science WW4-LKO, Friedrich-Alexander-Universität Erlangen-Nürnberg, Martensstrasse 7, 91058 Erlangen, Germany

<sup>§</sup>Regional Centre of Advanced Technologies and Materials, Czech Advanced Technology and Research Institute, Palacky University, Olomouc, 779 00, Czech Republic

## AUTHOR INFORMATION

### Corresponding Authors

\*E-mail: [johannes.will@fau.de](mailto:johannes.will@fau.de); [schmuki@ww.uni-erlangen.de](mailto:schmuki@ww.uni-erlangen.de);

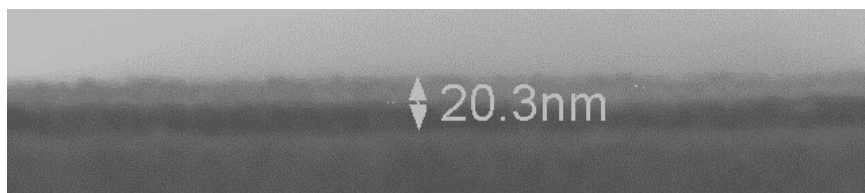

**Figure S1.** SEM cross-sectional image of a 20 nm thick as-deposited  $\text{TiO}_2$  layer on  $\text{SiO}_2$  with identical deposition parameters as for the gas cell experiments.

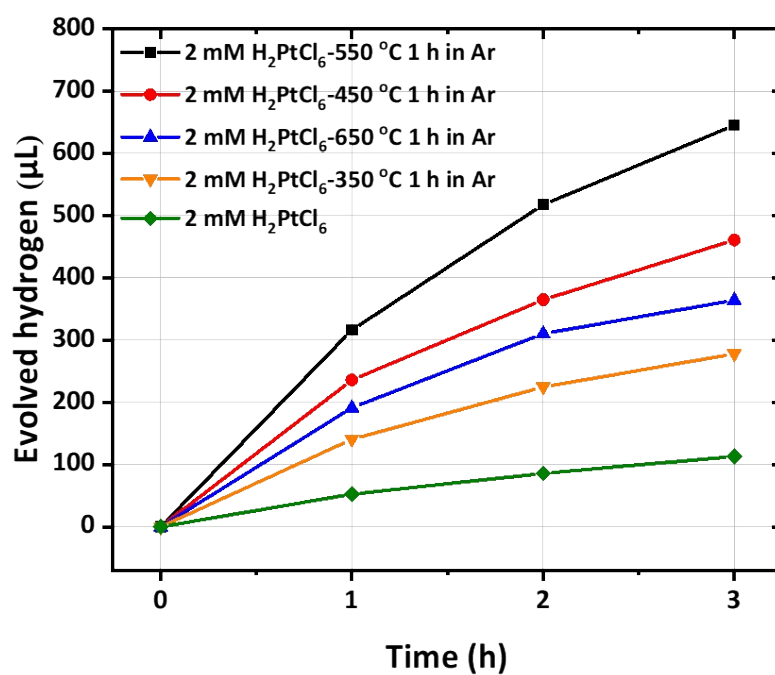

**Figure S2.** Time resolved hydrogen evolution data of samples with different thermal pre-annealing treatments in Ar atmosphere as compared to the non-treated sample.

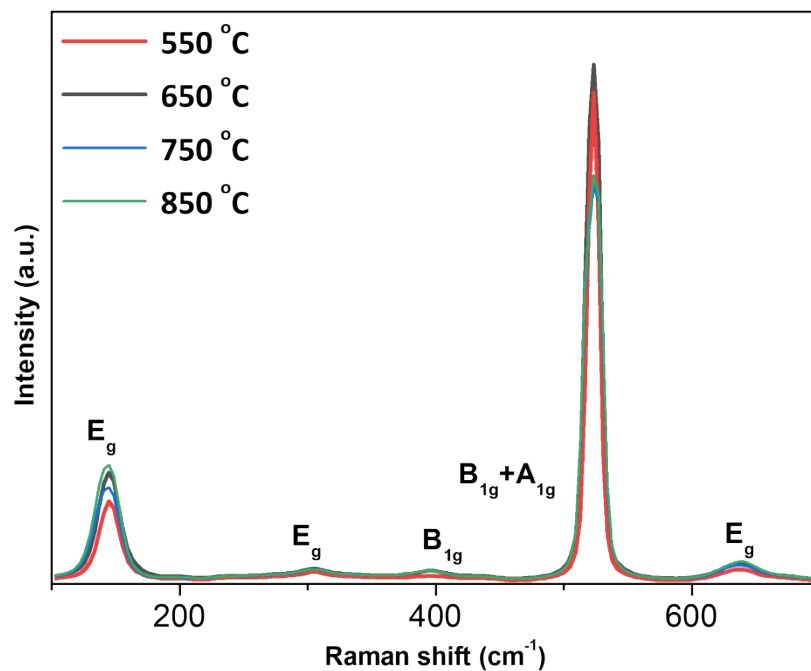

**Figure S3.** Raman spectra of the TiO<sub>2</sub> thin-films (deposited in a 2 mM H<sub>2</sub>PtCl<sub>6</sub> solution) annealed at different temperatures.

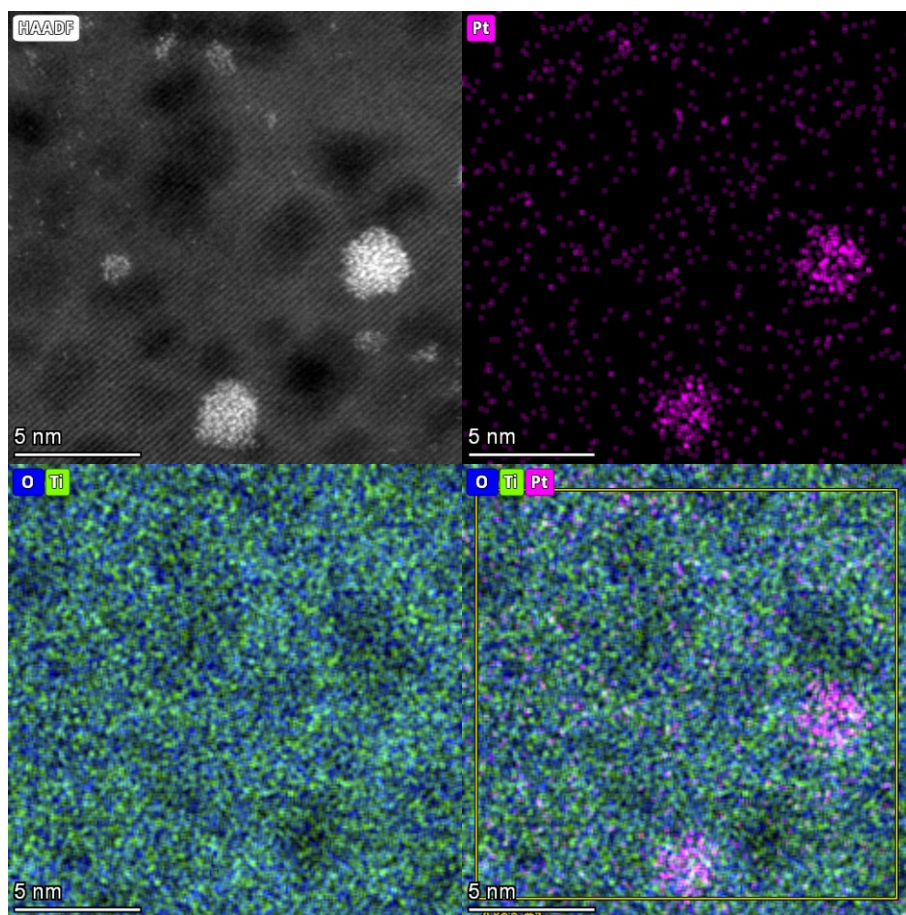

**Figure S4.** EDXS mapping of a  $\text{TiO}_2$  thin film loaded with Pt after annealing at 550 °C for 1h. The  $\text{TiO}_2$  composition of the area indicated on the bottom right yields a composition of 70 at% O and 30 at% Ti.

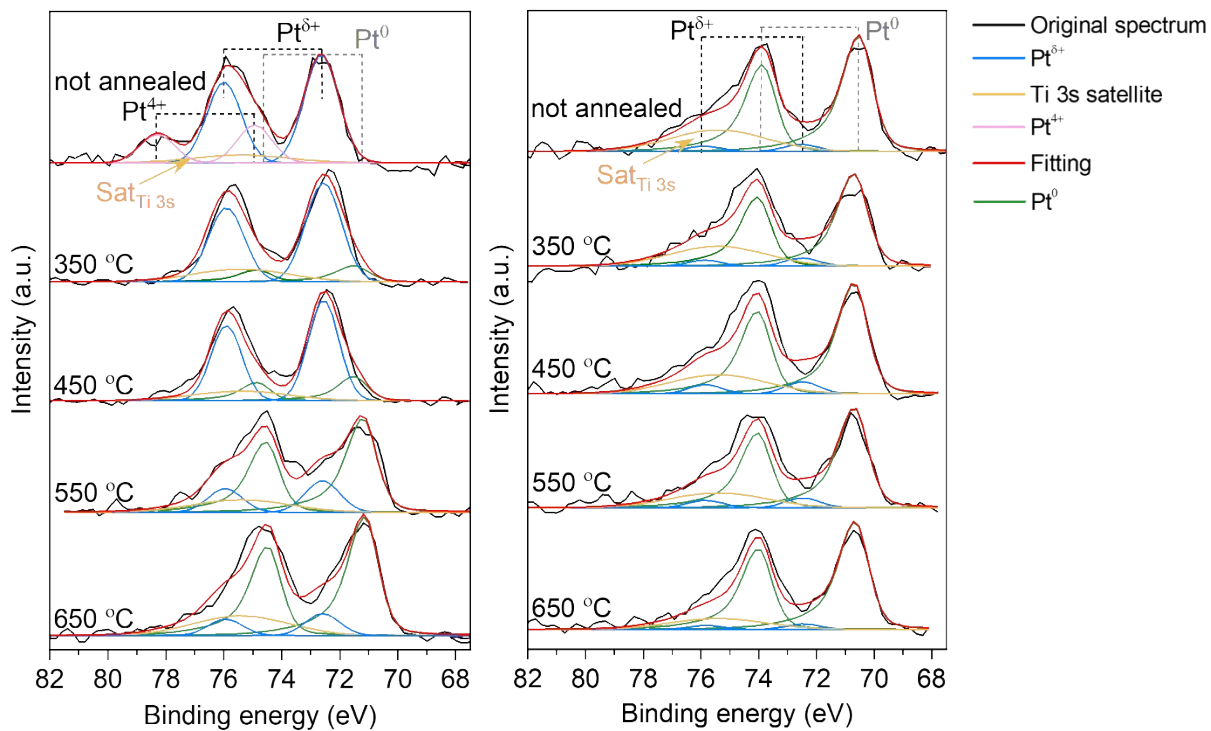

**Figure S5.** Pt 4f XPS spectra of Pt on TiO<sub>2</sub> after different thermal pre-treatments before (left) and after (right) photocatalysis for 3h illumination (275 nm, 30 mW).

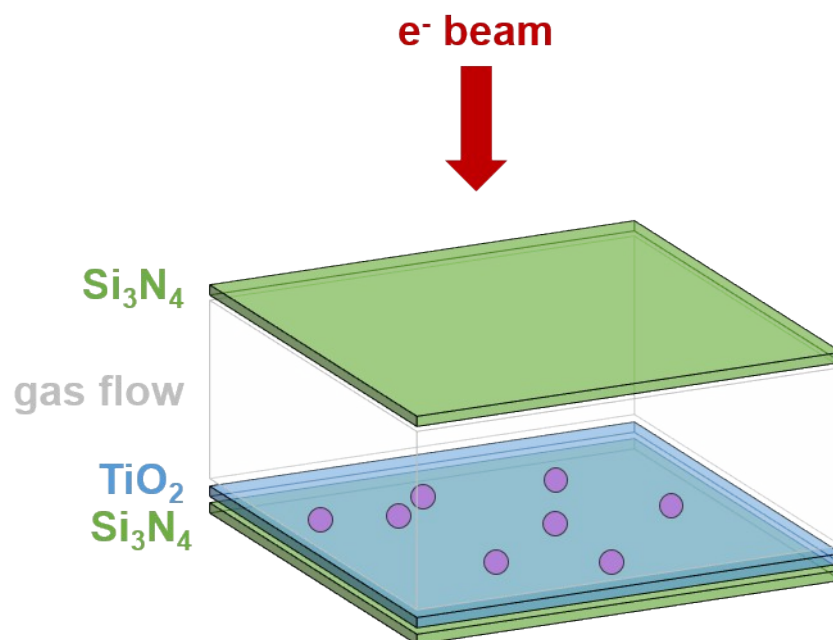

**Figure S6.** Scheme of the experimental setup. The electron beam is focused on the Pt containing TiO<sub>2</sub> surface, which is exposed to an Ar gas flow. The gas flow is constrained within the gas cell, while observations are enabled by several ten nanometer thick Si<sub>3</sub>N<sub>4</sub> windows.

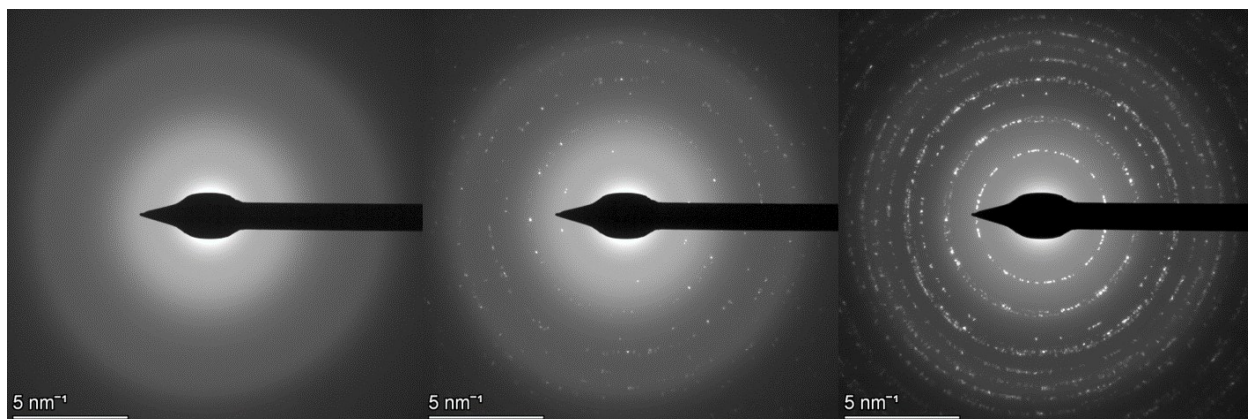

**Figure S7.** *In situ* SAED patterns of an amorphous TiO<sub>2</sub> film (left image) heated to 400 °C (heating rate 100°C s<sup>-1</sup>) in Ar atmosphere. The film starts to crystallize within 20 s (center image) and already exhibits its final polycrystalline nature after 2 min (right image). The pattern does not further change after 30 min at 400 °C.

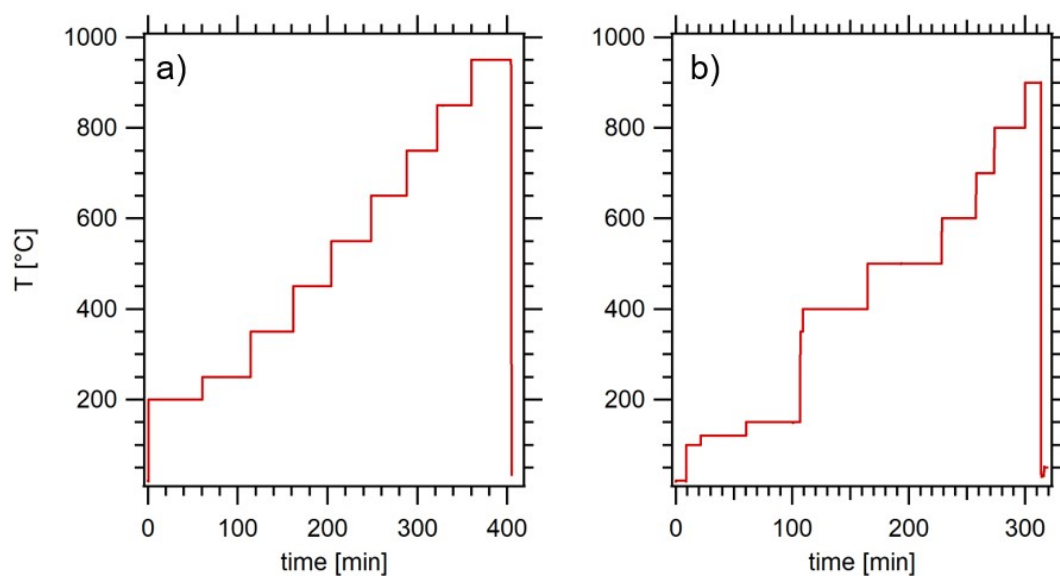

**Figure S8.** Measured temperature profiles of the heating experiments in Ar atmosphere for the samples produced at different  $H_2PtCl_6$  concentrations: a) 0.05 mM; b) 0.005 mM.

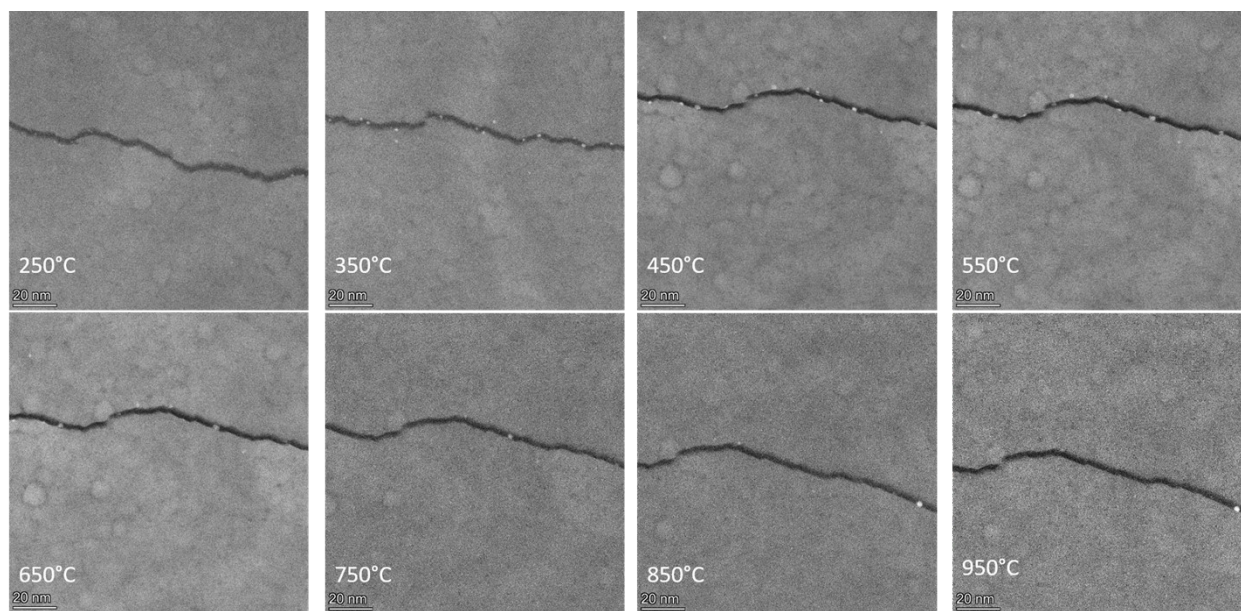

**Figure S9.** HAADF-STEM characterization at lower magnification in the same area, as in Figure 4.

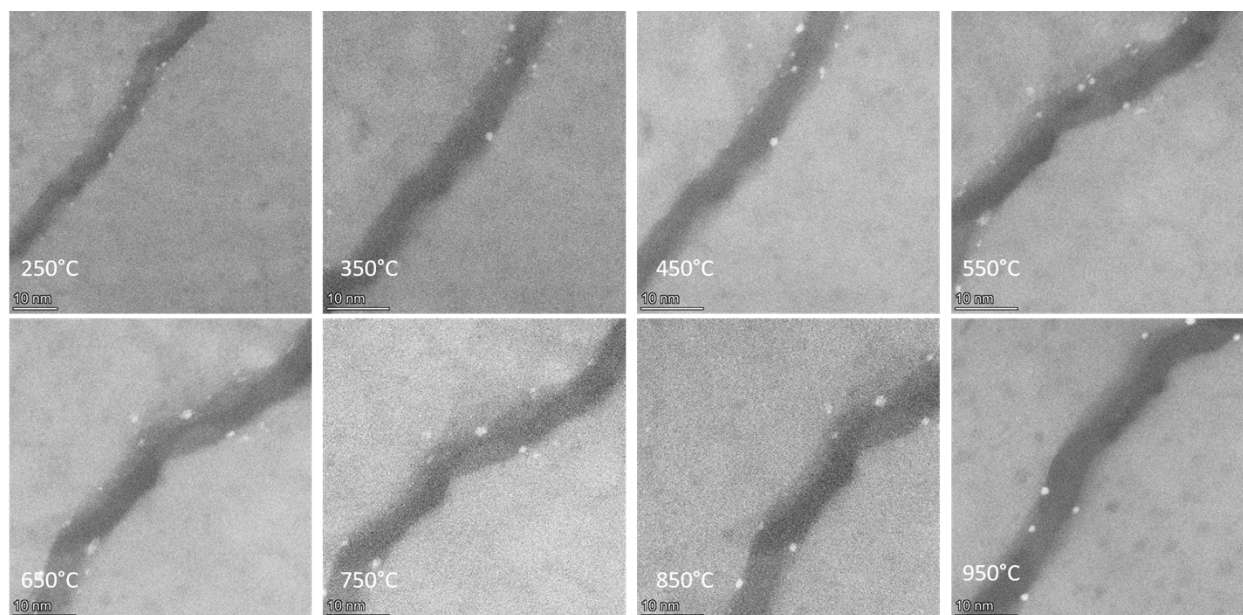

**Figure S10.** Identical-location HAADF-STEM images of the Pt SA decorated TiO<sub>2</sub> layer (using 0.05 mM H<sub>2</sub>PtCl<sub>6</sub>) heated in Ar atmosphere (700 mbar) to different temperatures (250–950 °C). The images are taken at a different site from that in the main text.

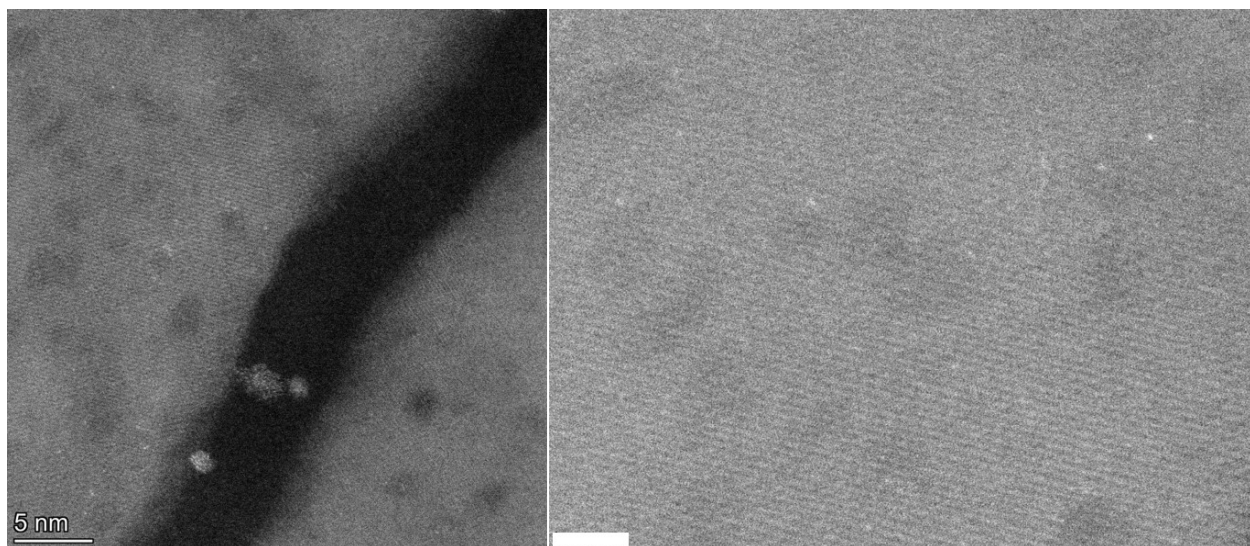

**Figure S11.** High magnification *ex situ* HAADF-STEM images of the Pt SA decorated TiO<sub>2</sub> layer (thermally treated following the procedure in Figure 4) after cooling down to room temperature. Remaining Pt agglomerates coexist with Pt SAs homogeneously distributed over the TiO<sub>2</sub> surface (the white bar corresponds to 2 nm).

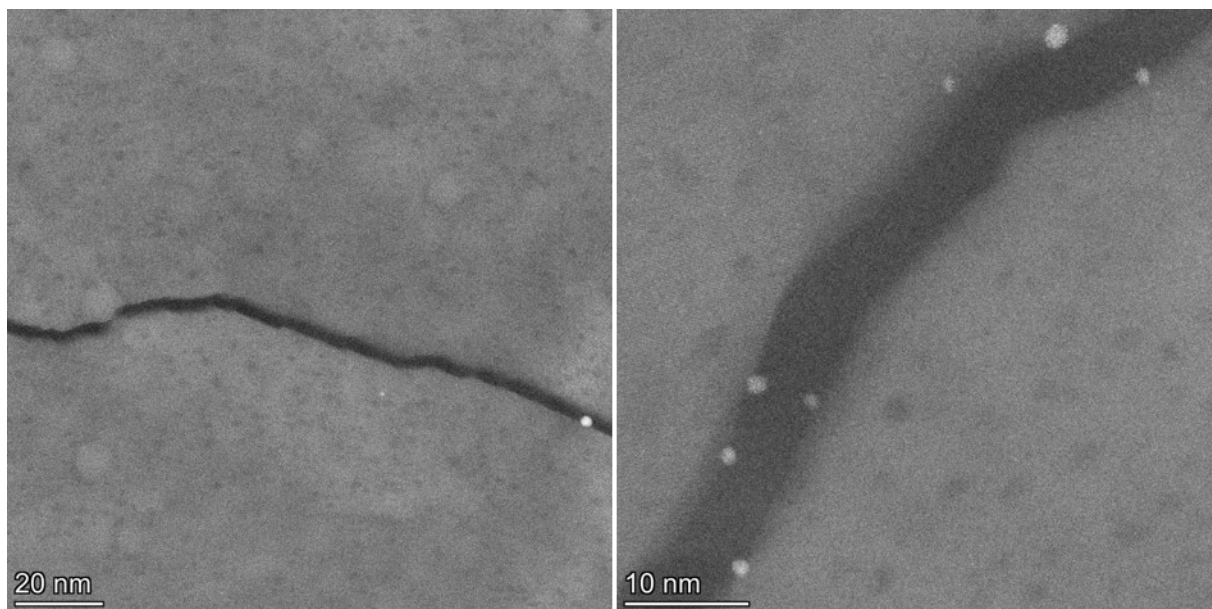

**Figure S12.** Identical-location HAADF-STEM images of the Pt SA decorated TiO<sub>2</sub> surface taken *in situ* at 950 °C (thermally treated following the procedure in Figure 4) and *ex situ* upon cooling down to room temperature. The left and right images taken at room temperature can be compared to Figure 4 (950 °C) and Figure S8 (950 °C), respectively.

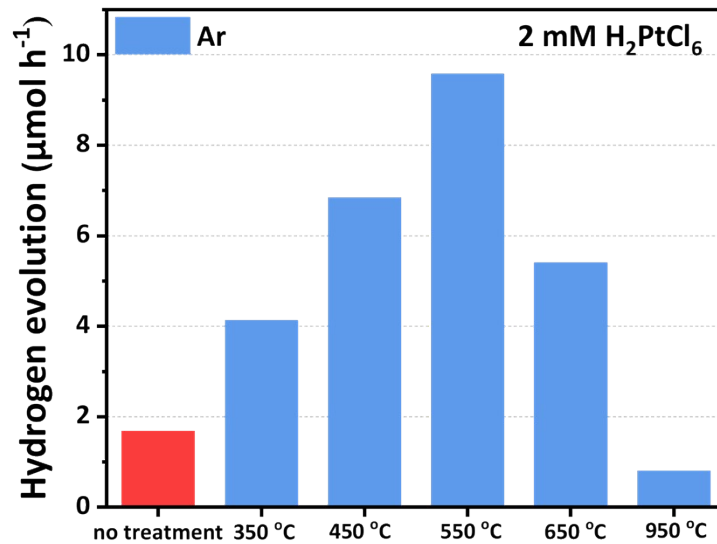

**Figure S13.** Hydrogen evolution data of the sample annealed at 950 °C as compared to the other samples.

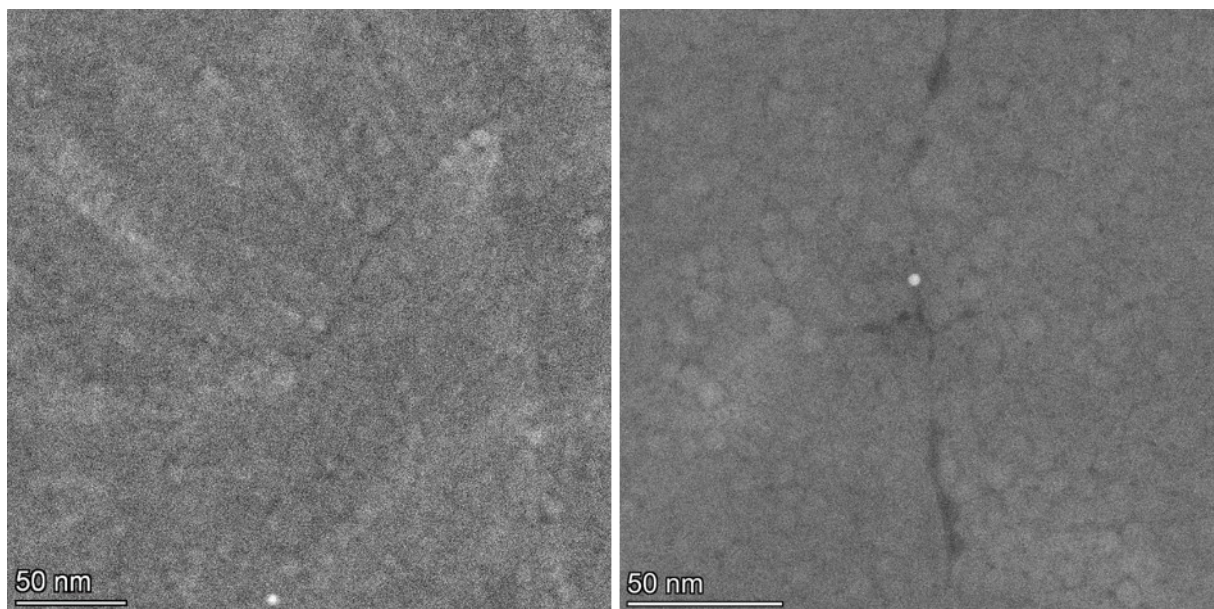

**Figure S14.** Low magnification *in situ* HAADF-STEM images of the Pt SA decorated (using 0.005 mM  $\text{H}_2\text{PtCl}_6$ ) amorphous  $\text{TiO}_2$  layer heated in Ar atmosphere (700 mbar) to 400 °C (left) and 900 °C (right). The images reveal an overall low degree of agglomeration.

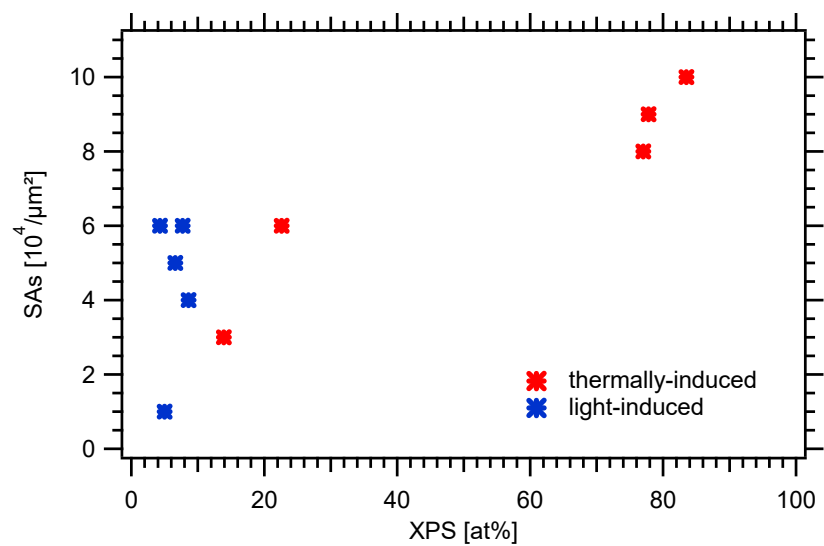

**Figure S15.** Relationship of the structural SA density as determined by STEM with the Pt<sup>δ+</sup> fraction as determined by XPS after thermally-induced (red) and light-induced agglomeration (blue).
